# Supplementary material
Source: HighWire-hosted journal article supplement (https://ebmtp.com/highwire/filestream/136149/field_highwire_adjunct_files/0/Halperin_85_2063.pdf)
Supplement: Halperin_85_2063.pdf [file Halperin_85_2063.pdf]

# 实践指南：特发性正常压力脑积水： 分流术的疗效与疗效预测因素

美国神经病学学会指南制定、发布、执行小组委员会报告

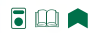

John J. Halperin, MD  
Roger Kurlan, MD  
Jason M. Schwalb, MD  
Michael D. Cusimano,  
MD, PhD, FRCSC  
Gary Gronseth, MD  
David Gloss, MD

Correspondence to  
American Academy of Neurology:  
guidelines@aan.com

## 摘要

**目的：**对特发性正常压力脑积水 (Idiopathic normal pressure hydrocephalus, iNPH) 采用分流术的效用和分流术效果的预测指标进行证据评估。

**方法：**我们按照 2004 年及 2011 年美国神经病学学会方法学对相关的已发表研究进行筛选并分级。

**结果：**21 篇文章中, 我们甄别出 3 篇 I 类文章。

**结论：**分流术对 iNPH 可能有效 (96% 的主观改善概率, 83% 的 6 个月定时步行距离试验的改善概率) (3 项 III 类)。严重不良事件风险为 11% (1 项 III 类)。成功的预测指标包括 R<sub>0</sub> 升高 (1 项 I 类, 多项 II 类)、脑血流量对乙酰唑胺的反应性受损 (通过 SPECT) (1 项 I 类) 及对腰池外引流 (1 项 III 类) 或反复腰椎穿刺的阳性反应。年龄可能并不是一个影响预后的因素 (1 项 II 类)。对于放射性核素显像或 MRI 导水管流速测定的效果尚无充分数据。

**证据分类：**临床医师可选择分流术作为 iNPH 患者的一种治疗方案以改善他们的主观症状和步态 (C 级)。由于存在严重不良事件发生的风险, 需谨慎权衡手术的风险与获益 (B 级)。临床医师需告知 R<sub>0</sub> 升高的患者及其家属, 他们对分流术有效的概率高于未升高的患者 (B 级)。临床医师可告知 iNPH 的患者及其家属: (1) 对腰池外引流或反复腰椎穿刺的阳性反应增加分流术有效的概率, (2) 年龄增加并不能降低分流术的成功概率 (均为 C 级)。 *Neurology*® 2016;85:2063-2071

## 术语

AAN = 美国神经病学学会; AD = 阿尔茨海默病; AE = 不良事件; CBF = 脑血流量; CI = 可信区间; CIBIC-Plus = 临床医师面访印象变化量表; CMI = 并发症指数; CSF-IT = 脑脊液输注试验; ELD = 腰池外引流; GRADE = 推荐评估、发展和评价分级; ICP = 颅内压; iNPH = 特发性正常压力脑积水; LP = 腰椎穿刺; NPH = 正常压力脑积水; TT = 放液试验。

1965 年, Hakim 和 Adams<sup>[1]</sup> 首次提出正常压力性脑积水 (normal pressure hydrocephalus, NPH) 这一疾病, 其临床表现特点为步态不稳、尿失禁和记忆障碍三联征; 腰椎穿刺 (lumbar puncture, LP) 示脑脊液压力正常; 影像学示脑室扩大; 行脑室分流术后症状改善。为数不多的可用的流行病学研究中仅有一项研究估算出在挪威人群中该病发病率为 5.5/100,000<sup>[2]</sup>。该疾病一直被强调是痴呆和步态不稳的潜在可逆性病因。

Hakim 和 Adams<sup>[1]</sup> 描述的 NPH 综合征现分为特发性 NPH (idiopathic NPH, iNPH) 和继发性 NPH<sup>[3]</sup>, 后者通常由蛛网膜下腔出血或感染性脑膜炎等疾病引起。脑室分流术被认为是继发性 NPH 的标准治疗方法<sup>[4]</sup>。然而对于 iNPH 行脑室分流术的实际经验十分有限, 综述性文献中对分流术效果的描述为多变、生存期短、不可预测并伴有严重风险<sup>[4,5]</sup>。基于这一信息, 我们对关于 iNPH 诊断和治疗的文献进行了系统性回顾。我们提出 2 个问题:

补充数据见  
[Neurology.org](#)

From the Overlook Medical Center (J.J.H., R.K.), Atlantic Neuroscience Institute, Summit, NJ; Department of Neurosurgery (J.M.S., M.D.C.), Henry Ford Medical Group, West Bloomfield, MI; Division of Neurosurgery (M.D.C.), St. Michael's Hospital, University of Toronto, Canada; Department of Neurology (G.G.), University of Kansas Medical Center, Kansas City; and Department of Neurology (D.G.), Geisinger Medical Center, Danville, PA. The American Association of Neurological Surgeons and the Congress of Neurological Surgeons affirm the educational content of this document. Go to [Neurology.org](#) for full disclosures. Funding information and disclosures deemed relevant by the authors, if any, are provided at the end of the article.

1. 脑室分流术用于治疗 iNPH 的效果如何（治疗性问题）？
2. 对于一项成功的分流术结局是否存在可靠的临床或实验室预测指标（预后性问题）（疗效和成功结局均定义为分流术后有持久、客观可见的及有临床意义的改善）？

**分析过程描述** 2010 年 11 月，美国神经病学学会（the American Academy of Neurology, ANN）指南制定、发布、实施小组委员会（附录 e-1 和 e-2 见 *Neurology*<sup>®</sup> 网站：Neurology.org）成立了制定这一指南的专家小组，制定程序依据 2004 年 ANN 发布的流程手册，除外 2 点：首先我们在得出结论时采用的方法是依据 2011 年 ANN 流程手册，其次采用 2011 年 ANN 流程手册中随后更新的治疗性证据分类方案<sup>[6,7]</sup>。我们首先在 MEDLINE、EMBASE、LILACS 和 Cochrane 数据库检索 1980~2012 年 9 月的文献，条件限定为英文出版物，检索词为（“正常压力性脑积水”或“脑积水”或“NPH”或“成人脑积水综合征”）和（“分流术”或“治疗”）和（“试验”或“结局”或“预测指标”或“效果”）和“神经外科学”。共检索到 438 篇引文。我们在 MEDLINE 和 Cochrane 上重新检索 2012~2013 年 11 月、检索词为（“正常压力性脑积水”或“NPH”）的文献，并手动过滤首次检索到的文献。在此更新之后，另有 2 项相关研究发表并纳入本次分析中。我们剔除了病例报道、述评、meta 分析、综述文献、重复的报告和仅针对继发性 NPH 的文献，包括病例数 < 10 例患者的 iNPH 或疑似 iNPH 研究（小样本量缺乏统计效力）、采用无对照组或评估治疗效果时的患者随访时间 < 3 个月。至少两位审稿人独立工作，彼此对所有保留的摘要的相关性进行筛查。如果二者结论不一致且不能达成共识，我们将引入第 3 位审稿人。两位小组成员采用预先制定的标准对文章中与其中一个问题的相关性进行详细评估。这一筛选过程共选出 36 篇文献。每篇文章均根据 AAN 的治疗性（2011）和预后性（2004）文献分类法（见附录 e-3）<sup>[6,7]</sup> 进行分类。表 e-1 呈现了证据级别被评定在 IV 类以上的研究（1 项除外）。

具有典型临床表现的患者多根据一系列检测而行手术预筛选，这不同于被研究的患者，因此许多纳入的研究缺乏普遍性。

这些研究中，我们依据正式的 AAN - 改良的推荐分级的评估、制定与评价（Grading of Recommendations Assessment, Development and Evaluation, GRADE）方法<sup>[6,8]</sup> 提高或降低某些治疗性或预后性结论的推荐等级（见表 e-2 和 e-3）。我们将推荐和证据直接关联（见附录 e-4）。

**证据分析** 有 3 项 I 类、8 项 II 类和 7 项 III 类研究与预后性问题相关。3 项 III 类研究与治疗性问题相关。所有剩余文章均有 IV 类证据。

**脑室分流术对 iNPH 的疗效如何？** 一项 III 类证据的前瞻性研究对 75 例 NPH 患者（其中 58 例为 iNPH）进行评估：54 例患者脑脊液输注试验（CSF infusion test, CSF-IT）或脑脊液放液试验（CSF tap test, TT）阳性（见下文），21 例患者试验结果均为阴性并作为对照组<sup>[5]</sup>。仅 CSF-IT 或 CSF-TT 阳性的患者接受脑室分流术。随访 6 个月后，分流术组 54 例患者中有 52 例（96%）患者报道有“整体改善的主观印象”（是 / 否；没有进一步的描述），而未行分流术的患者中仅为 19% [ 风险差异 0.77, 95 可信区间（confidence interval, CI）0.55 ~ 0.90]。在客观测试中，83% 的治疗患者在步态测试中有所提高，而未行分流术的患者仅为 24%（风险差异 0.59, 95% CI 0.36 ~ 0.83）；65% 和 48% 的治疗组患者在反应时间测量和记忆测试中有所改善，而对照组则分别为 46% 和 28%。步态和主观改善均有显著意义。（两者  $p = 0.0006$ ；Bonferroni 校正的 Fisher 精确检验）。仅 43% 的患者在术后 5 年仍可接受测试（未手术患者为 19%），这可能与不相关的死亡率及整体健康状态下降相关。对于行分流术的患者，评估的效果降低，仅 40% 的患者步态及应答时间有改善、10% 的患者记忆力改善；56% 的患者报道与术前基线相比有持续的主观改善。有 3 例出现硬脑膜下出血或积液（5%）、1 例需行血肿清除术、1 例有浅表伤口感染、1 例肺动脉栓塞（1 项 III 类研究）<sup>[5]</sup>。

第二项 III 类证据水平的前瞻性、非随机试验中<sup>[9]</sup>，对根据临床症状、脑室扩大、放射性核素显像 CSF 流速研究（向腰蛛网膜下腔内注射放射性同位素，跟踪其流进

或流出脑室的一系列图像)示脑室淤积而诊断为疑似 iNPH 的 33 例患者进行评估。所有患者均建议手术,其中 19 例患者接受了手术。其余患者,4 例在手术等候名单中、10 例患者取消手术。这 14 例患者作为对照组与行手术的患者进行对比。术后 3~4 个月,由独立的观察员采用临床医师面访印象变化量表(Clinician Interview-Based Impression of Change, plus carer interview, CIBIC-Plus)对预后进行评估,该量表是用来评估总体评级、认知、平衡、步态和泌尿功能的变化<sup>[10]</sup>。行分流术的患者中,中位 CIBIC-Plus 评级为 2 级(中度改善),对照组为 6 级(中度恶化)(整体分级  $p < 0.001$ , Kruskal-Wallis 检验)。在整体分级方面,18 例行分流术的患者中有 14 例显示明显或中度改善、1 例显示轻度恶化、无出现明显或中度恶化的病例。而对照组中,14 例患者中有 9 例表现为明显或中度恶化( $p = 0.03$ , Fisher 精确检验;相对风险 0.35, 95% CI 0.13~0.83)。步态测试中,89% 的行分流术的患者显示中度到明显改善,而对照组无此表现。

第三项为采用改良的 Rankin 量表作为客观预后评估方法的前瞻性、随机、非盲法研究<sup>[11]</sup>(III 类),共纳入 93 例疑似 iNPH 患者(至少符合三联征中的 1 条临床要素及影像学示脑室扩大)。患者在随机化 1 个月内或 3 个月内随机接受腰池腹膜腔引流术。意向性分析中,即刻组 49 例患者中有 32 例及延迟组 44 例患者中有 2 例在随机后 3 个月评估的校正量表评分改善  $\geq 1$  分[差异 61% (95% CI 42%~68%),  $p < 0.0001$ ]。

**结论。**分流术对于 iNPH 患者可能有效,有 96% 的主观改善概率、83% 的 6 个月限时行走测试改善概率(3 项 III 类研究)。严重不良事件(adverse events, AE)风险为 11%。由于 95% 患者报道有主观症状改善,相比于对照组仅为 19%,分流术具有较强的主观效果,我们将证据强度由极低级提高至低级。客观评估中,仅步态改善明显。

**是否有分流术成功结局的可靠临床或实验室预测指标?**所有的研究中,作者将具有全部或部分临床三联征表现、脑影像学研究示脑室增大、无导致继发性 NPH 病史的患者纳入候选名单中。由于缺乏用于 iNPH 诊断的客观参考标准,我们采用临床和影像发现相结合的方

式(总结见日本 iNPH 指南或其他地方)作为诊断基础<sup>[12,13]</sup>。

**CSF 血流动力学和输注试验。**除外 CSF 外引流的临床效果,各研究还对 CSF 的动力学进行研究。CSF 流动随动脉压呈脉动-压力性波动,伴 B 型波;后者的颅内压(intracranial pressure, ICP)以 30~120 秒为周期缓慢节律性波动<sup>[14]</sup>。一项在 51 例 iNPH 患者中开展的关于 CSF 引流(IV 类,联合偏倚)和 CSF 动力学(II 类)的研究中,未发现 B 型波幅或频率与分流术效果间的关系。两项小样本研究(1 项 I 类<sup>[14]</sup>和 1 项 II 类<sup>[16]</sup>)也未发现 B 型波与分流术效果间的联系,但这两项研究缺乏检测差异的效力,未进一步给予考虑。

1 项 I 类研究、多项 II 类研究和 1 项 III 类研究均认为  $R_o$  是一个相关但独立的参数。 $R_o$  是一种 CSF-IT 测定中 CSF 流出阻力的测量方法。其计算方法为平台期 CSF 压力减去 CSF 开放压再除以输注率: $R_o = (P_p - P_{op}) / \text{输注率}$ 。一项纳入 142 例 iNPH 患者的 I 类研究<sup>[17]</sup>中,术前对  $R_o$  进行测量,但其结果直到最终盲法结局分析时才公开(由于患者范围受限而缺乏普遍性),未发现  $R_o$  与结局间的相关性。然而,这项研究发现,不同水平的  $R_o$  应用于基于临床和影像学标准预选择的人群中,其阳性预测率可高达 94%,但阴性预测率  $\leq 19\%$ 。一项纳入 17 例诊断为 iNPH 的患者的研究(II 类)<sup>[18]</sup>中,有 14 例患者  $R_o > 12 \text{ mmHg/mL/min}$ (为异常),2 例  $R_o < 12$  的患者对分流术有反应。总的来说,  $R_o$  是唯一可预测分流术效果的可测量变量(步态改善  $p = 0.007$ , 总 NPH 评分  $p = 0.022$ ) (表 1)。对 95 例 NPH 患者评估分流术效果的多变量逻辑回归分析<sup>[19]</sup>显示,  $R_o \geq 18$  是阳性反应唯一有意义的预测指标(NPH 分级改善的比值比 4.39, 95% CI 1.25~16.7)。一项纳入 55 例行分流术的 NPH 患者(40 例为 iNPH)的回顾性研究中(II 级,但由于是根据 CSF-IT 结果进行患者筛选,故缺乏普遍性)<sup>[20]</sup>,分流术有效者与无效者间的 CSF 参数无差异。特别地,16 例  $R_o < 18$  和 8 例  $R_o < 14$  的患者的分流术效果良好。然而,基于 CSF-IT 平台期压力  $> 22 \text{ mmHg}$  或 TT 阳性筛选的接受手术的患者,其  $R_o$  与平台期压力具有强相关性( $r^2 = 0.63$ )。一项 III 类研究亦显示存在正相关性<sup>[21]</sup>。

| 步态    | 尿失禁 |    | 认知 |                   |   |
|-------|-----|----|----|-------------------|---|
| 正常    | 5   | 无  | 5  | 无                 | 6 |
| 步行需帮助 | 4   | 很少 | 4  | 主观记忆力减退           | 5 |
| 需拄拐   | 3   | 偶尔 | 3  | 客观记忆力减退但独立        | 4 |
| 需他人帮助 | 2   | 经常 | 2  | 独立性部分丧失           | 3 |
| 轮椅或卧床 | 1   | 持续 | 1  | 定向障碍 <sup>2</sup> | 2 |
|       |     |    |    | 缺乏自理能力的继发性痴呆      | 1 |

再版自 *British Journal of Neurosurgery* (Sorteberg A, Eide PK, Fremming AD. A prospective study on the clinical effect of surgical treatment of normal pressure hydrocephalus: the value of hydrodynamic evaluation. *Br J Neurosurg* 2004 18:149–157). © 2004, 获得 Informa Healthcare 授权<sup>[18]</sup>。

**结论。** 疑似 iNPH 患者中，伴 R。增高的患者对分流术的效果较那些不伴 R。增高的患者更好（1 项 I 类研究和多项结论一致的 II 类研究），但低 R。不能排除分流术的效果。

**并发症。** 一项关于分流术效果的人口统计学 II 类研究<sup>[22]</sup> 发现，对腰池外引流（external lumbar drainage, ELD）有效的患者，其对分流术的效果与 90 岁内的年龄无关 [ 年龄并非合并症指数（comorbidity index, CMI）的组成部分 ]。

一项 III 类研究（先前讨论到的）<sup>[21]</sup> 建立了一份医学诊断用 CMI 表格（表 2）。64 例 iNPH 患者中，评分 ≤ 3 的患者效果更佳（ $p = 0.003$ ）。总的来说，66% 的 iNPH 患者效果良好，但 83% 的低 CMI 评分者亦具有良好效果。

**结论。** 年龄可能并不是分流术效果差的独立危险因素（1 项 II 类研究）。疑似 iNPH 患者中，无充分证据证明那些具有 ≥ 3 个主要并发症的患者对分流术的效果较那些伴有较少并发症的患者差（1 项 III 类研究）。

**TT/ELD。** 1 项研究中（存在疾病谱偏倚的 III 类研究）<sup>[23]</sup>，19 例 iNPH 患者接受带中阻流阀的延长

ELD 后再行分流术。ELD 改善预示分流术的效果。步态测量时发现，19 例患者中有 16 例 ELD 后改善的患者其分流术后亦有所改善；3 例 ELD 后步态无改善的患者中有 1 例患者在分流术后有改善。一项纳入 142 例 iNPH 患者的 I 类研究<sup>[17]</sup>（先前讨论的）中，在术前对患者进行 TT 的测试，但结果直到最终盲法结局分析时才公开（由于患者范围受限故缺乏普遍性），发现 TT 值与预后无相关性。然而，该项研究发现，在以临床表现和影像学标准为基础预筛选的患者群中，TT 的阳性预测值达 88%，而阴性预测值仅为 18%，使得总精确值为 53%。

**结论。** 疑似 iNPH 的患者中，尚缺乏充足的高质量证据支持 ELD 效果改善可预测分流术的效果。TT 后有改善的患者对分流术的效果可能更佳，但阴性的 TT 不能排除分流术的效果。

**Tc 扫描示脑血流量及乙酰唑胺反应性。** 一项纳入 162 例患者的 I 类研究（基于 TT 和 CT 脑池造影并碘剂强化的结果筛选接受手术的患者，故普遍性有限）<sup>[24]</sup> 发现，有效果的患者与对照组或无效的患者相比 SPECT 脑血流量（cerebral blood flow, CBF）

|               | 1分                                | 2分                        | 3分  |
|---------------|-----------------------------------|---------------------------|-----|
| <b>血管危险因素</b> | 高血压                               | 糖尿病                       |     |
| <b>周围血管阻塞</b> | 主动脉股动脉旁路；支架；颈内动脉狭窄                | 周围血管栓塞                    |     |
| <b>脑血管疾病</b>  | 后循环缺血                             | 血管性脑病；TIA（短暂性脑缺血发作）；PRIND | 脑梗塞 |
| <b>心脏</b>     | 心律失常；瓣膜病；心力衰竭（冠状）；支架；主动脉冠状动脉旁路；梗死 |                           |     |

缩略语：PRIND = 持续可逆性缺血性神经功能缺损。

每项提及的症状或疾病按指示的参数值（1~3分）评分。总和代表个体的并发症指数。

再版自 *Acta Neurochirurgica Supplement* (Kiefer M, Eymann R, Steudel WJ. Outcome predictors for normal-pressure hydrocephalus. *Acta Neurochir Suppl* 2006; 96:364–367), © 2004, 获得 Springer 授权<sup>[21]</sup>。

无差别。该项研究还发现,与对照组( $p < 0.0025$ )和无效果者( $p < 0.005$ )相比,有效果患者的 CBF 对乙酰唑胺的反应性显著受损<sup>[24]</sup>。

**结论**在疑似 iNPH 的患者中, CBF 对乙酰唑胺反应性受损的患者的分流术效果可能优于 CBF 对乙酰唑胺反应性未受损的患者(1 项降级的 I 类研究,因其不严密和非直接性)。

**MRI 导水管脑脊液流动性。** 一项 II 类研究和 3 项 III 类研究是关于 MRI 导水管区 CSF 流动的研究。在这项 II 类研究<sup>[25]</sup>中,通过临床及脑影像学检查筛选了 49 例疑似 NPH 的患者,其中 36 例增补了大容量 LP 的结果。分流术后 86% 的患者步态改善,69% 的患者尿失禁改善,44% 患者认知功能改善。尽管所有导水管 CSF 流速  $> 33 \text{ mL/min}$  的患者均有功能改善,但升高的 CSF 流速并不能预测任何功能方面的效果。5 例 TT 试验后无临床意义改善的患者其 CSF 流速高于 LP 后改善的患者的流速。

一项 III 类研究<sup>[26]</sup>回顾了 35 例疑似 NPH 患者。通过硬膜外监测仪评估 ICP,患者分层如下: ICP  $> 12 \text{ mmHg}$ (活动性脑积水,  $n = 15$ )、ICP  $< 12 \text{ mmHg}$  但压力波动异常(代偿性脑积水,  $n = 18$ ); ICP  $< 12 \text{ mmHg}$  且压力波动无异常(脑萎缩,  $n = 2$ )。将患者的导水管区流量与 27 例健康志愿者进行比较,并以流速表示;约  $> 10 \text{ mm/s}$  视为升高。在 33 例活动性或代偿性脑积水患者中,有 29 例流速升高;这些患者中有 28 例经分流术后有所改善。4 例正常导水管流速的患者中,有 3 例分流术后获得改善。另一项 III 类研究<sup>[27]</sup>中纳入 61 例行 TT 试验、CSF-IT 试验与 MRI 检查的疑似 NPH 患者(41 例 iNPH 患者),并基于临床表现、脑影像学及 CSF-IT 试验中  $R_0 \geq 13$  筛选后方可行分流手术。选用  $24 \text{ mL/min}$  作为流速分界值(低于 II 类研究中的值,且与其他 III 类研究的流速测定无直接可比性<sup>[26]</sup>),发现 MRI 检测 iNPH 的灵敏度为 46%、特异性为 95%。第三项 III 类研究<sup>[28]</sup>回顾了 38 例疑似 NPH 患者,并以导水管区 CSF 搏动量分层为低( $\leq 50 \mu\text{L}$ )、中( $51 \sim 100 \mu\text{L}$ )、高( $\geq 101 \mu\text{L}$ )。这一测定法与分流术效果并无关联。

**结论。** MRI 扫描示高导水管区 CSF 流速且 CSF-IT 试验异常的疑似 iNPH 患者

或许分流术效果更优(1 项 II 类研究和 2 项 III 类研究)。

**神经病理学。** 一项纳入 39 例 iNPH 患者的 III 类研究<sup>[29,30]</sup>中利用综合 NPH 量表评估步态、认知、尿失禁,研究发现中重度阿尔兹海默病(Alzheimer disease, AD)神经病理学表现的患者其分流术后功能评分改善  $\geq 2$  分的可能性(8 例中有 2 例)较无 AD 病理的患者低(8 例中有 6 例)( $p = 0.014$ )。脑室磷酸化 tau 蛋白/A $\beta$ 1-42 比值升高与 AD 及腰穿 CSF 比值均有关,提示此比值可能是一个预测指标<sup>[29]</sup>。

**结论。**在疑似 iNPH 患者中,无充分证据确定是否是中重度 AD 神经病理学表现的患者对分流术的效果较无 AD 病理的患者差(1 项 III 类队列研究)。

**室周高信号。** 一项单一 II 类研究<sup>[31]</sup>检测室周高信号是否可用于效果预测。并未给出正式的统计学数据,但经 Bonferroni 校正后的 Fisher 检验  $p$  值为 0.12。由于无法检测出差异性,通过改良的 GRADE 法,我们下调此项研究为 III 类研究。

**结论。**对于疑似 iNPH 患者,无充足证据确定影像学上的室周高信号是否是分流术效果的预测因素(1 项因缺乏精确性而下调的 II 类研究)。

**放射性核素脑池造影术。**尚无关于此问题的 IV 类以上的研究<sup>[31]</sup>。

**结论。**无充足证据确定疑似 iNPH 患者且放射性核素脑池造影术示持续性室周淤积是否能够预测分流术效果(仅 1 项 IV 级研究)。

**临床应用** 由于评估治疗性问题的标准较评估诊断性问题的标准限制多,在治疗章节引用的研究尚不能提供关于分流术疗效的高水平证据。这就是说,值得注意的是,正如在一项所引用的治疗性 III 类研究<sup>[5]</sup>中一样,在其他研究中(图 1 示)超过 80% 的患者基于 TT 试验<sup>[31]</sup>、ELD 试验<sup>[23]</sup>、CSF-IT 试验<sup>[18,19]</sup>经分流手术获得改善。同样,在关于其他诊断性方面的研究<sup>[26,27,30]</sup>中,患者均经 TT 试验或 CSF-IT 试验预筛选,所有患者(忽略评估的试验结果)的总体缓解率约为 80%。

许多其他研究报道大部分 iNPH 患者经脑室分流术后获得改善,但尚不能达到  $\geq$

图1 10项描述性研究中每一项研究中行分流术后获得改善的患者百分比

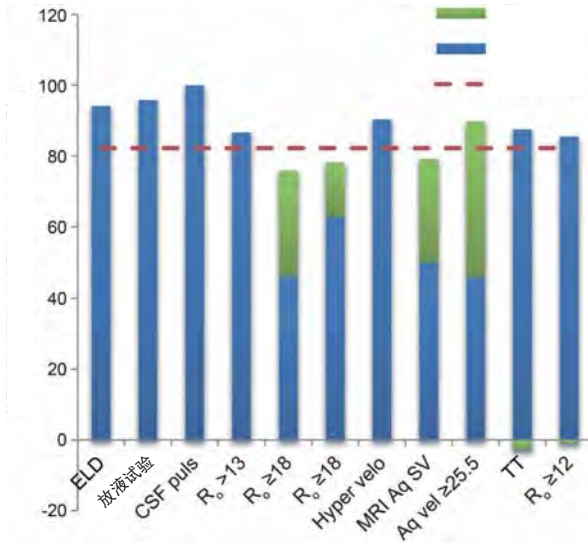

纳入的评估不同诊断性检测方法的研究结果的总结：腰大池脑脊液外引流（ELD；柱1<sup>[23]</sup>）、脑脊液放液试验（TT；柱2<sup>[31]</sup>）、脑脊液搏动性（CSF puls；柱3<sup>[16]</sup>）、脑脊液灌注试验脑脊液流动阻力（ $R_0$ ；柱4<sup>[18]</sup>、5<sup>[19]</sup>、6<sup>[20]</sup>）、用流速评估的MRI导水管区脑脊液流速测定（Hyper velo；柱7<sup>[26]</sup>）、导水管区搏动量（Aq SV；柱8<sup>[28]</sup>）、导水管超高速（Aq vel；柱9<sup>[27]</sup>、定义为 $\geq 25.5$ ）、TT试验后改善（柱10<sup>[17]</sup>）及灌注试验 $R_0 < 12$ （柱11<sup>[17]</sup>）。每个柱形条反映了该研究中所有术后获得改善的患者百分比。水平虚线表示所有研究的整体缓解率。所有研究中，纳入的患者均符合自发性正常压力性脑积水的临床及影像学诊断标准。在柱1<sup>[23]</sup>、2<sup>[31]</sup>、3<sup>[16]</sup>、4<sup>[18]</sup>、5<sup>[19]</sup>、7<sup>[26]</sup>、10<sup>[17]</sup>和11<sup>[17]</sup>中，患者仅基于上述标准筛选入组。在柱6<sup>[20]</sup>、8<sup>[28]</sup>和9<sup>[27]</sup>中，为行分流手术，患者需额外满足TT试验或CSF-IT试验阳性。后者研究中，大量上述附加试验结果为阴性的患者对分流术也有效。因此，本图显示了试验+和试验-的患者百分比。

III类证据，通常是因为缺乏对照组、随机或治疗/评估盲法。许多研究不能甄别出一种主要预后评估方法。一些研究报告，与固定压力阀相比，使用程序化（可调节压力）阀门可减少并发症的发生率<sup>[32-34]</sup>。一些研究亦报道分流术的获益随时间而降低<sup>[35-38]</sup>。

与所引用的诸多研究（图2）中的各种技术的预测性影响相比，TT试验作为应用最广泛的筛查技术之一，在增大灵敏度和特异性上的作用极为有限。然而，这有可能会被误导，因为TT试验和灌注试验在所引用的研究中<sup>[31]</sup>及许多其他方面的评估中用作分流术前患者预筛选手段。如图2所示，TT试验、ELD试验、或许还有反映动脉压力的CSF搏动性，均显示不同的高灵敏度但不完全的特异性。在仅基于临床及影像学标准筛选出的患者中实施的CSF-IT试验所测得的 $R_0$ 值似乎增加灵敏度及特异性，但仍产生许多假阴性结果。在经TT试验或灌注试验筛选出的患者中，通过MRI测量其导水管区的流动性，或许一定程度上渐进式增加灵敏度

和特异性。

并发症的评估可提高对分流术效果的预测；然而，其阴性预测价值较为有限，提示这些因素在考虑制定分流手术决策时应予以重视，但不应作为绝对排除标准。最后，尽管如意料中一样，AD样病理表现预示着分流术效果差，但分流术术前脑部活检相关的发病率似乎远大于可能的获益。然而，是否可采用新型淀粉样蛋白成像技术或CSF标志分子的测量作为一种有效替代手段非常值得研究。

分流术与巨额费用及可能的发病率和致死率密切相关。一篇综述中发现汇总的平均分流术并发症发生率为38%，且整体永久性神经功能缺损和死亡率高达6%<sup>[4]</sup>。另一项发表的文献报道分流手术的死亡率为5%~15%<sup>[39]</sup>。在最近报道的SINPHONI多中心试验（III类研究）中，22%的行分流术的患者产生严重AE<sup>[11]</sup>。除承担住院及手术费用外，植入式分流术的患者还要承担分流失败、脑室炎、术后感染的风险。延长的腰椎穿刺引流的诊断性操作具有脑膜炎和死亡的风险，分别为1.8%~3.6%和0.2%<sup>[39,40]</sup>。几项近期的研究表明并发症发生率为15%<sup>[e1]</sup>~28%<sup>[e2]</sup>。

**推荐** 临床医师可以选择分流术作为iNPH患者的一种治疗方案以改善他们的主观症状和步态（C级）。由于存在严重AE风险，需谨慎权衡手术的风险与获益（B级）。临床医师需告知 $R_0$ 升高的患者，相比于 $R_0$ 不升高的iNPH患者，他们对分流术有效的概率升高（B级）。临床医师需告知iNPH患者，异常的CSF-IT试验结果或对重复LP的阳性反应可增加分流术有效的概率（C级）。临床医师需告知iNPH患者及其家属，不断增加的年龄不一定会降低分流术成功的可能性（C级）。临床医师需告知疑似iNPH且通过SPECT检测CBF对乙酰唑胺反应性受损的患者，他们或许更有可能对分流术有效（C级）。

**讨论** iNPH患者行脑室分流术的疗效如何？在甄别出的3项证据水平高于IV类的研究中，提示iNPH患者行脑室分流术可获益，但6个月后的效果下降<sup>[5]</sup>，且18个月不足一半的患者的所有iNPH症状被认为有所改

图2

显示各讨论内容的增量获益的受试者工作特征曲线

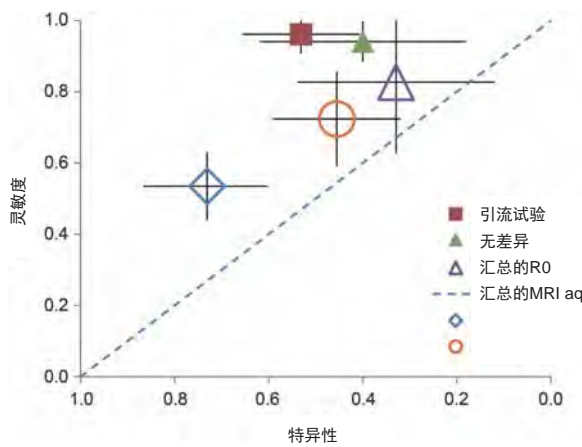

评估所描述的不同技术的相对灵敏度和特异性；各研究列于图1中。因动脉搏动增加的CSF压力升高标记为CSF puls hyper。结合图1中柱4<sup>[18]</sup>、5<sup>[19]</sup>、6<sup>[20]</sup>和11<sup>[17]</sup>的研究结果作出RO的汇总评估。结合柱7<sup>[26]</sup>、8<sup>[28]</sup>和9<sup>[27]</sup>的研究结果作出MRI上CSF流动性提高的汇总评估。结合柱2<sup>[31]</sup>和10<sup>[17]</sup>的研究结果作出CSF引流试验的汇总评估。ELD =腰大池脑脊液外引流。

善<sup>[63]</sup>。尽管绝大多数已发表的研究报道 iNPH 患者分流术后获得临床改善，但目前为止这些研究的设计不能提供关于疗效的较高证据等级。应意识到，iNPH 患者脑室分流术的临床效果大多数是基于无对照的观察性研究。

**如果存在关于疗效的证据，是否存在有良好预后后的临床或实验室预测指标？** 临床医师早已意识到至少某些诊断为 iNPH 的患者对脑室分流术无效，导致大量关于寻找预后的临床或实验室预测指标的研究发表。本综述仅筛选出一小部分可提供高证据等级的文章以支持所研究的预测指标。区分 iNPH 与 AD 间的作用非常重要但也很困难。据报道，疑似 iNPH 的患者可合并存在 AD<sup>[64]</sup>。并不意外的是，在分流术时甄别出 AD 样病理预示着预后较差。有证据表明，ELD 后步态改善<sup>[22]</sup>、MRI 测得的导水管区 CSF 高流速<sup>[26]</sup>及异常的颅内 CSF 流体动力学<sup>[21]</sup>可能预示良好的分流术效果。然而，值得指出的是，有部分发表的证据等级较低的研究提示这些因素并不具有预测性<sup>[25, e5-e7]</sup>。这些操作与巨额费用及可能的并发症密切相关<sup>[40]</sup>，而且如 CSF-IT 试验所需的设备在有些国家并未广泛应用（尤其是在美国）。预测指标的价值最终确立取决于设计完善的临床试验中分流术疗效的确立。

**对进一步研究的建议** 脑室分流术用于治疗 iNPH 的疗效的问题十分重要，尤其在最近的一些研究中报道了令人失望的应答率、未能实现长期持久的缓解及大量与分流术有关的风险<sup>[45]</sup>。显然需要设计完善的关于 iNPH 患者行脑室分流术的研究，包括设立对照干预、随机分配、治疗设盲、更多客观的预后评估及充足的长期观察期以记录任何获益的持续时间。如同考虑其他并发症及功能状态一样，基于可能的 AD 状态（采用先进的神经影像学或 CSF 标志物）对患者进行分层，可提供附加信息。

诊断的准确性、效果预测及治疗疗效方面的问题错综复杂。据估计，2003 年 ~ 2009 年，美国约有 8,340 例 iNPH 患者实施了分流手术<sup>[68]</sup>。由于在美国此种手术实施频繁且新型分流手术方式更加昂贵，因此确定分流手术是否有效十分重要。正确实施关于诊断、预后及治疗的研究十分必要。

### 作者贡献

John J. Halperin: study concept and design, acquisition of data, analysis or interpretation of data, drafting/ revising the manuscript, critical revision of the manuscript for important intellectual content, study supervision. Roger Kurlan: study concept and design, acquisition of data, analysis or interpretation of data, drafting/ revising the manuscript, critical revision of the manuscript for important intellectual content. Jason M. Schwab: study concept and design, acquisition of data, analysis or interpretation of data, drafting/ revising the manuscript. Michael D. Cusimano: study concept and design, acquisition of data, analysis or interpretation of data, drafting/ revising the manuscript. Gary Gronseth: study concept and design, acquisition of data, analysis or interpretation of data, drafting/ revising the manuscript, critical revision of the manuscript for important intellectual content. David Gloss: analysis or interpretation of data, drafting/ revising the manuscript, critical revision of the manuscript for important intellectual content.

### 研究基金

This guideline was developed with financial support from the American Academy of Neurology. Authors who serve as AAN subcommittee members or methodologists (J.J.H., G.G., D.G.) were reimbursed by the AAN for expenses related to travel to subcommittee meetings where drafts of manuscripts were reviewed.

### 信息披露

J. Halperin serves on the editorial boards of *The Neurologist* and *ACP Smart Medicine*; serves on the *Neurology* journal Level of Evidence Review Team; has received honoraria for continuing medical education lectures; has received research support from the Centers for Disease Control and Prevention; and has given expert testimony and acted as witness or consultant regarding the defense of several physicians in medical malpractice cases. R. Kurlan serves as a supplement editor for *Neurology*; serves on the editorial board of *Tremor and Other Hyperkinetic Movements*; serves on the speakers bureau of Teva Pharmaceuticals; receives research support from the NIH, Kyowa, AstraZeneca, Rhythm, and Phytopharm; and served as a consultant on a medical malpractice case related to alleged missed diagnosis of normal pressure hydrocephalus (NPH). J. Schwab serves on the Michigan Parkinson Foundation Physician and Epilepsy Foundation Physician Advisory Board; is a member of the American Association of Neurological Surgeons Subspecialty MOC Educational Materials and the *Congress Quarterly* editorial boards; has received honoraria from Medtronic; performs shunt placements for NPH; and has received research support from the NIH and internal grants from the Henry Ford Health System Neuroscience Institute.

M. Cusimano reports no disclosures relevant to the manuscript. G. Gronseth serves as an evidence-based medicine methodologist for the AAN and serves on the *Neurology* Level of Evidence editorial board. D. Gloss serves as an evidence-based medicine methodologist for the AAN and serves on the *Neurology* Level of Evidence editorial board. Go to [Neurology.org](http://Neurology.org) for full disclosures.

### 免责声明

Clinical practice guidelines, practice advisories, systematic reviews, and other guidance published by the American Academy of Neurology (AAN) and its affiliates are assessments of current scientific and clinical information provided as an educational service. The information (1) should not be considered inclusive of all proper treatments, methods of care, or as a statement of the standard of care; (2) is not continually updated and may not reflect the most recent evidence (new evidence may emerge between the time information is developed and when it is published or read); (3) addresses only the question(s) specifically identified; (4) does not mandate any particular course of medical care; and (5) is not intended to substitute for the independent professional judgment of the treating provider, as the information does not account for individual variation among patients. In all cases, the selected course of action should be considered by the treating provider in the context of treating the individual patient. Use of the information is voluntary. The AAN provides this information on an "as is" basis and makes no warranty, expressed or implied, regarding the information. The AAN specifically disclaims any warranties of merchantability or fitness for a particular use or purpose. The AAN assumes no responsibility for any injury or damage to persons or property arising out of or related to any use of this information or for any errors or omissions.

### 利益冲突

The American Academy of Neurology (AAN) is committed to producing independent, critical, and truthful clinical practice guidelines (CPGs). Significant efforts are made to minimize the potential for conflicts of interest to influence the recommendations of this CPG. To the extent possible, the AAN keeps separate those who have a financial stake in the success or failure of the products appraised in the CPGs and the developers of the guidelines. Conflict of interest forms were obtained from all authors and reviewed by an oversight committee prior to project initiation. The AAN limits the participation of authors with substantial conflicts of interest. The AAN forbids commercial participation in, or funding of, guideline projects. Drafts of the guideline have been reviewed by at least 3 AAN committees, a network of neurologists, *Neurology* peer reviewers, and representatives from related fields. The AAN Guideline Author Conflict of Interest Policy can be viewed at [www.aan.com](http://www.aan.com). For complete information on this process, access the 2004 AAN process manual.<sup>6</sup>

Received April 06, 2015. Accepted in final form July 20, 2015.

### 参考文献

1. Hakim S, Adams RD. The special clinical problem of symptomatic hydrocephalus with normal cerebrospinal fluid pressure: observations on cerebrospinal fluid hydrodynamics. *J Neurol Sci* 1965;2:307–327.
2. Brean A, Eide PK. Prevalence of probable idiopathic normal pressure hydrocephalus in a Norwegian population. *Acta Neurol Scand* 2008;118:48–53.
3. Ishikawa M. Clinical guidelines for idiopathic normal pressure hydrocephalus. *Neurol Med Chir* 2004;44:222–223.
4. Hebb AO, Cusimano MD. Idiopathic normal pressure hydrocephalus: a systematic review of diagnosis and outcome. *Neurosurgery* 2001;49:1166–1184; discussion 1184–1186.
5. Kahlon B, Sjunnesson J, Rehncrona S. Long-term outcome in patients with suspected normal pressure hydrocephalus. *Neurosurgery* 2007;60:327–332; discussion 332.
6. American Academy of Neurology. Clinical Practice Guidelines Process Manual, 2004 ed. [online]. Available at: <https://www.aan.com/Guidelines/Home/UnderDevelopment>. Accessed November 1, 2014.

7. American Academy of Neurology. Clinical Practice Guidelines Process Manual, 2011 ed. [online]. Available at: <https://www.aan.com/Guidelines/Home/Development>. Accessed November 1, 2011.
8. Guyatt GH, Oxman AD, Schunemann HJ, Tugwell P, Knottnerus A. GRADE guidelines: a new series of articles in the *Journal of Clinical Epidemiology*. *J Clin Epidemiol* 2011;64:380–382.
9. Razay G, Vreugdenhil A, Liddell J. A prospective study of ventriculo-peritoneal shunting for idiopathic normal pressure hydrocephalus. *J Clin Neurosci* 2009;16:1180–1183.
10. Knopman DS, Knapp MJ, Gracon SI, Davis CS. The Clinician Interview-Based Impression (CIBI): a clinician's global change rating scale in Alzheimer's disease. *Neurology* 1994;44:2315–2321.
11. Kazui H, Miyajima M, Mori E, Ishikawa M; SINPHONI-2 Investigators. Lumboperitoneal shunt surgery for idiopathic normal pressure hydrocephalus (SINPHONI-2): an open-label randomised trial. *Lancet Neurol* 2015;14:585–594.
12. Ishikawa M, Hashimoto M, Kuwana N, et al. Guidelines for management of idiopathic normal pressure hydrocephalus. *Neurol Med Chir* 2008;48(suppl):S1–S23.
13. Relkin N, Marmarou A, Klinge P, Bergsneider M, Black PM. Diagnosing idiopathic normal-pressure hydrocephalus. *Neurosurgery* 2005;57:S4–S16; discussion ii–v.
14. Stephensen H, Andersson N, Eklund A, Malm J, Tisell M, Wikkelso C. Objective B wave analysis in 55 patients with non-communicating and communicating hydrocephalus. *J Neurol Neurosurg Psychiatry* 2005;76:965–970.
15. Woodworth GF, McGirt MJ, Williams MA, Rigamonti D. Cerebrospinal fluid drainage and dynamics in the diagnosis of normal pressure hydrocephalus. *Neurosurgery* 2009;64:919–925; discussion 925–926.
16. Foss T, Eide PK, Finset A. Intracranial pressure parameters in idiopathic normal pressure hydrocephalus patients with or without improvement of cognitive function after shunt treatment. *Dement Geriatr Cogn Disord* 2007;23:47–54.
17. Wikkelso C, Hellstrom P, Klinge PM, Tans JT; European iNPH Multicentre Study Group. The European iNPH Multicentre Study on the predictive values of resistance to CSF outflow and the CSF tap test in patients with idiopathic normal pressure hydrocephalus. *J Neurol Neurosurg Psychiatry* 2013;84:562–568.
18. Sorteberg A, Eide PK, Fremming AD. A prospective study on the clinical effect of surgical treatment of normal pressure hydrocephalus: the value of hydrodynamic evaluation. *Br J Neurosurg* 2004;18:149–157.
19. Boon AJ, Tans JT, Delwel EJ, et al. The Dutch normal-pressure hydrocephalus study. How to select patients for shunting? An analysis of four diagnostic criteria. *Surg Neurol* 2000;53:201–207.
20. Kahlon B, Sundbarg G, Rehncrona S. Lumbar infusion test in normal pressure hydrocephalus. *Acta Neurol Scand* 2005;111:379–384.
21. Kiefer M, Eymann R, Steudel WI. Outcome predictors for normal-pressure hydrocephalus. *Acta Neurochir Suppl* 2006;96:364–367.
22. Marmarou A, Young HF, Aygok GA, et al. Diagnosis and management of idiopathic normal-pressure hydrocephalus: a prospective study in 151 patients. *J Neurosurg* 2005;102:987–997.
23. Panagiotopoulos V, Konstantinou D, Kalogeropoulos A, Maraziotis T. The predictive value of external continuous lumbar drainage, with cerebrospinal fluid outflow controlled by medium pressure valve, in normal pressure hydrocephalus. *Acta Neurochir* 2005;147:953–958; dis-



- discussion 958.
24. Chang CC, Asada H, Mimura T, Suzuki S. A prospective study of cerebral blood flow and cerebrovascular reactivity to acetazolamide in 162 patients with idiopathic normal-pressure hydrocephalus. *J Neurosurg* 2009;111:610–617.
  25. Dixon GR, Friedman JA, Luetmer PH, et al. Use of cerebrospinal fluid flow rates measured by phase-contrast MR to predict outcome of ventriculoperitoneal shunting for idiopathic normal-pressure hydrocephalus. *Mayo Clin Proc* 2002;77:509–514.
  26. Poca MA, Sahuquillo J, Busto M, et al. Agreement between CSF flow dynamics in MRI and ICP monitoring in the diagnosis of normal pressure hydrocephalus: sensitivity and specificity of CSF dynamics to predict outcome. *Acta Neurochir Suppl* 2002;81:7–10.
  27. Al-Zain FT, Rademacher G, Meier U, Mutze S, Lemcke J. The role of cerebrospinal fluid flow study using phase contrast MR imaging in diagnosing idiopathic normal pressure hydrocephalus. *Acta Neurochir Suppl* 2008;102:119–123.
  28. Kahlon B, Annertz M, Stahlberg F, Rehncrona S. Is aqueductal stroke volume, measured with cine phase-contrast magnetic resonance imaging scans useful in predicting outcome of shunt surgery in suspected normal pressure hydrocephalus? *Neurosurgery* 2007;60:124–129; discussion 129–130.
  29. Patel S, Lee EB, Xie SX, et al. Phosphorylated tau/amyloid beta 1-42 ratio in ventricular cerebrospinal fluid reflects outcome in idiopathic normal pressure hydrocephalus. *Fluids Barriers CNS* 2012;9:7.
  30. Hamilton R, Patel S, Lee EB, et al. Lack of shunt response in suspected idiopathic normal pressure hydrocephalus with Alzheimer disease pathology. *Ann Neurol* 2010;68:535–540.
  31. Kilic K, Czorny A, Auque J, Berkman Z. Predicting the outcome of shunt surgery in normal pressure hydrocephalus. *J Clin Neurosci* 2007;14:729–736.
  32. Zemack G, Romner B. Adjustable valves in normal-pressure hydrocephalus: a retrospective study of 218 patients. *Neurosurgery* 2002;51:1392–1400; discussion 1400–1402.
  33. Zemack G, Romner B. Seven years of clinical experience with the programmable Codman Hakim valve: a retrospective study of 583 patients. *J Neurosurg* 2000;92:941–948.
  34. Reinprecht A, Czech T, Dietrich W. Clinical experience with a new pressure-adjustable shunt valve. *Acta Neurochir* 1995;134:119–124.
  35. Savolainen S, Hurskainen H, Paljarvi L, Alafuzoff J, Vapalahti M. Five-year outcome of normal pressure hydrocephalus with or without a shunt: predictive value of the clinical signs, neuropsychological evaluation and infusion test. *Acta Neurochir* 2002;144:515–523; discussion 523.
  36. Malm J, Kristensen B, Stegmayr B, Fagerlund M, Koskinen LO. Three-year survival and functional outcome of patients with idiopathic adult hydrocephalus syndrome. *Neurology* 2000;55:576–578.
  37. Raftopoulos C, Massager N, Baleriaux D, Deleval J, Clarysse S, Brotchi J. Prospective analysis by computed tomography and long-term outcome of 23 adult patients with chronic idiopathic hydrocephalus. *Neurosurgery* 1996;38:51–59.
  38. Klinge P, Marmarou A, Bergsneider M, Relkin N, Black PM. Outcome of shunting in idiopathic normal-pressure hydrocephalus and the value of outcome assessment in shunted patients. *Neurosurgery* 2005;57:S40–S52; discussion ii–v.
  39. Marmarou A, Black P, Bergsneider M, Klinge P, Relkin N. Guidelines for management of idiopathic normal pressure hydrocephalus: progress to date. *Acta Neurochir Suppl* 2005;95:237–240.
  40. Greenberg BM, Williams MA. Infectious complications of temporary spinal catheter insertion for diagnosis of adult hydrocephalus and idiopathic intracranial hypertension. *Neurosurgery* 2008;62:431–435; discussion 435–436.

(肖波 审校)
